# Supplementary material for: The HaDREB2 transcription factor enhances basal thermotolerance and longevity of seeds through functional interaction with HaHSFA9
Source: PubMed Central journal article supplement (PMC2706249; doi:10.1186/1471-2229-9-75), 2009-06-19
Supplement: 1471-2229-9-75-S5.pdf [file 1471-2229-9-75-S5.pdf]

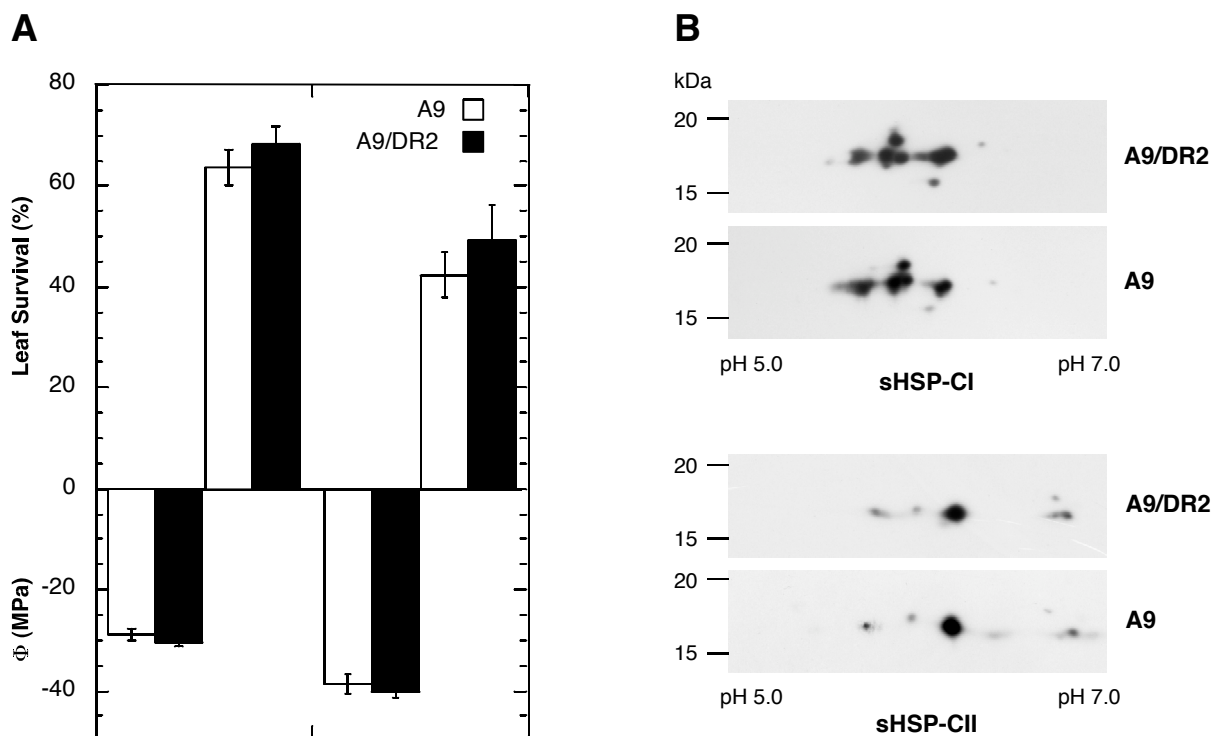

**Additional file 5** *The 35S:DR2 transgene when combined with 35S:A9 does not further enhance tolerance to severe dehydration (analyzed by leaf survival) or accumulation of sHSPs.*

A.- Leaf survival was scored as the percentage of seedlings with green leave(s) that resisted DT2, even if the whole seedling did not resist (top). Average water potential ( $\Phi$ ) reached in the different DT2 assays (bottom). We used the same 35S:A9/DR2 lines (A9/DR2), and the corresponding, sibling, 35S:A9 lines (A9) employed for the experiments in Figure 5. Data were obtained from 3 to 14 experimental repeats per line and average water potential condition. B. - Representative sHSP-CI (top) and sHSP-CII (bottom) accumulation patterns determined by 2D-western analysis. We could not observe reproducible differences between A9/DR2 and A9 lines.
